# Supplementary material for: An environmentally friendly and economical strategy to cyclically produce cellulose nanocrystals with high thermal stability and high yield
Source: Royal Society of Chemistry journal article supplement (doi:10.1039/d1gc01392k), 2021-01-01
Supplement: d1gc01392k1.pdf [file d1gc01392k1.pdf]

# **An Environmentally Friendly and Economical Strategy to Cyclically Produce Cellulose Nanocrystals with High Thermal Stability and High Yield**

Feng Tang <sup>a</sup>, Yingzhan Li <sup>a, b\*</sup>, Junwen Huang<sup>a</sup>, Jinhong Tang <sup>a</sup>, Xinyi Chen <sup>a</sup>, Hou-Yong Yu <sup>a\*</sup>, Ying Zhou <sup>a</sup>, Dongping Tang <sup>a</sup>

<sup>a</sup>The Key Laboratory of Advanced Textile Materials and Manufacturing Technology of Ministry of Education, Zhejiang Sci-Tech University, Hangzhou 310018, China. E-mail

[yingzhanli@zstu.edu.cn](mailto:yingzhanli@zstu.edu.cn); [phdyu@zstu.edu.cn](mailto:phdyu@zstu.edu.cn)

<sup>b</sup>National Manufacturing Innovation Center of Advanced Dyeing and Finishing Technology, Taian, 271000, China.

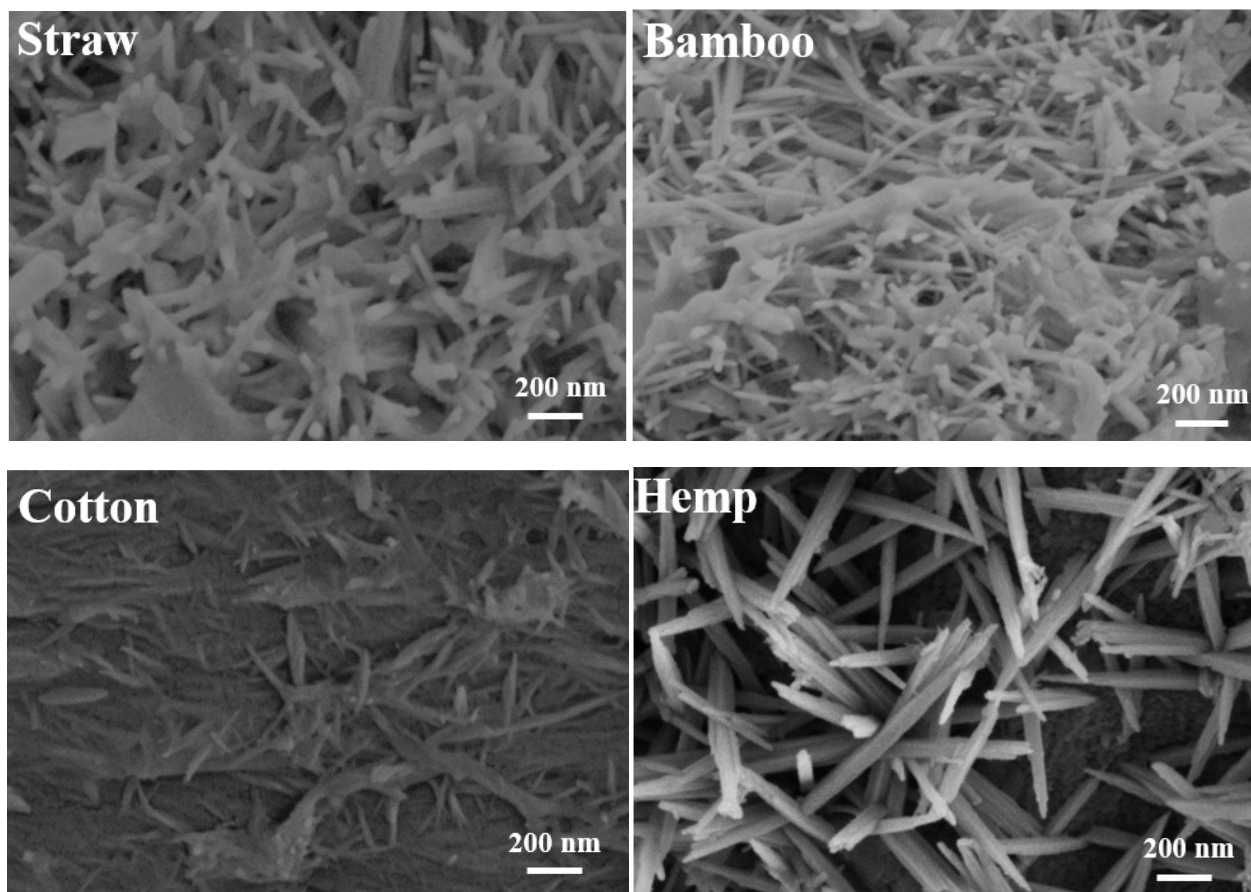

**Fig.S1** FE- SEM images of CNC prepared from four kinds of straw, bamboo, cotton and hemp

**Tab. S1.** The role of ferric chloride in the development of CNC preparation

|   | Contents                                                                                                                                                                        | The role played of FeCl <sub>3</sub> | Report time | Ref. |
|---|---------------------------------------------------------------------------------------------------------------------------------------------------------------------------------|--------------------------------------|-------------|------|
| 1 | Ferric chloride was introduced into hydrochloric acid hydrolysis to extract cellulose nanocrystals (CNCs) from microcrystalline celluloses (MCC) under hydrothermal conditions. | catalyst                             | 2017        | 1    |
| 2 | FeCl <sub>3</sub> -catalyzed deep eutectic solvent system (F-DES) was invented to fabricate cellulose nanocrystals                                                              | catalyst                             | 2019        | 2    |
| 3 | Preparation of CNC by FeCl <sub>3</sub> Catalysed CA Hydrolysis of MCC                                                                                                          | catalyst                             | 2020        | 3    |
| 4 | Use ferric chloride to dissolve cellulose                                                                                                                                       | dissolving agent                     | 2020        | 4    |

**Tab. S2.** Comparison of the preparation conditions and properties of cellulose nanocrystals prepared by other method with the cellulose nanocrystals reported in this work.

| Raw materials                               | Preparation conditions                                            | Yield (%) | Crystallinity (%)<br>CNC/raw materials | T <sub>max</sub> (°C) | Disadvantage                                                                                                               | Ref.      |
|---------------------------------------------|-------------------------------------------------------------------|-----------|----------------------------------------|-----------------------|----------------------------------------------------------------------------------------------------------------------------|-----------|
| Commercial microcrystalline cellulose (MCC) | Four inorganic chlorides and HCl                                  | 78.6      | 91.2/83.5                              | 346.3/358.7           | Strong acidity of hydrochloric acid requires a lot of water for post-treatment, and hydrochloric acid cannot be recovered. | 1         |
| Bleached eucalyptus kraft pulp (BEKP)       | FeCl <sub>3</sub> -catalyzed deep eutectic solvent system (F-DES) | 75.8      | 80.8/75.7                              | 358.2/355.3           | The experiment process is complicated.                                                                                     | 2         |
| BEKP                                        | FeCl <sub>3</sub> -catalyzed citric acid                          | 52.0      | 75.95/67.75                            | 369.3/352.6           | Failed to realize the recovery and reuse of experimental solvents.                                                         | 3         |
| BEKP                                        | Concentrated organic acids                                        | 10.3      | 81.05/76.0                             | /                     | Low yield and large environmental pollution caused by organic acids.                                                       | 5         |
| MCC                                         | 2,2,6,6-tetramethylpiperidine-1-oxyl radical (TEMPO)              | 37.2      | /                                      | /                     | Low yield and multiple reaction steps and preparation process had a greater impact on the environment.                     | 6         |
| MCC                                         | Sulfuric acid                                                     | 54.4      | 76.9/70.5                              | 245.4/357.5           | Low yield and thermal stability, strong acidity of hydrochloric acid requires a lot of water for post-treatment.           | 7         |
| MCC                                         | Hydrochloric acid                                                 | 93.7      | 87.3/76.2                              | 354.5/358.7           | Strong acidity of hydrochloric acid requires a lot of water for post-treatment, and hydrochloric acid cannot be recovered. | 8         |
| MCC                                         | Hydrogen peroxide (H <sub>2</sub> O <sub>2</sub> )                | /         | 88.7/77.1                              | 325.3/353.7           | Failed to realize the recovery and reuse of experimental solvents.                                                         | 9         |
| MCC                                         | Recyclable Citric/Hydrochloric Acids                              | 87.0      | 82.8/70.5                              | 347.3/357.5           | Post-processing requires a lot of water.                                                                                   | 7         |
| MCC                                         | FeCl <sub>3</sub>                                                 | 93.2      | 75.8/72.7                              | 354.1/347.1           | /                                                                                                                          | This work |

**Tab.S3** Average Dimensions, Zeta Potential, Carboxyl Contents, Conductometric,  $T_{max}$  of  $CNC_{FeX}$  and MCC

| Sample      | <sup>a</sup> Dimensions (nm) |          | Zeta Potential (mV) | Carboxyl contents (mmol/g) | Conductometric DS | <sup>b</sup> $T_{max}$ (°C) |
|-------------|------------------------------|----------|---------------------|----------------------------|-------------------|-----------------------------|
|             | length                       | diameter |                     |                            |                   |                             |
| MCC         | /                            | /        | /                   | /                          |                   | 347.1 ± 3.8                 |
| $CNC_{Fe1}$ | 435 ± 6.2                    | 38 ± 2.6 | -21.5 ± 1.3         | 0.231 ± 0.013              | 0.038 ± 0.0021    | 354.3 ± 2.8                 |
| $CNC_{Fe2}$ | 442 ± 8.9                    | 35 ± 3.8 | -20.7 ± 3.5         | 0.248 ± 0.025              | 0.040 ± 0.0041    | 351.1 ± 3.9                 |
| $CNC_{Fe3}$ | 439 ± 7.6                    | 41 ± 4.8 | -20.5 ± 1.2         | 0.206 ± 0.057              | 0.033 ± 0.0092    | 354.3 ± 2.2                 |
| $CNC_{Fe4}$ | 441 ± 8.3                    | 39 ± 3.3 | -22.3 ± 2.8         | 0.251 ± 0.018              | 0.041 ± 0.0029    | 354.1 ± 3.8                 |
| $CNC_{Fe5}$ | 455 ± 5.1                    | 35 ± 1.8 | -20.8 ± 0.9         | 0.236 ± 0.033              | 0.038 ± 0.0053    | 356.7 ± 4.1                 |

<sup>a</sup> Average length and diameter were obtained by statistics 200 CNC.

<sup>b</sup>  $T_{max}$  was calculated from TGA curves.

**Tab. S4** Analysis of variance (ANOVA) of the length and diameter of prepared CNCs

| (a)     | Anova: Single Factor | length    |       |           |           |                      |              |
|---------|----------------------|-----------|-------|-----------|-----------|----------------------|--------------|
| SUMMARY |                      |           |       |           |           |                      |              |
|         | Groups               | Count     | Sum   | Average   | Variance  |                      |              |
|         | Column 1             | 200       | 87000 | 435       | 132.46231 |                      |              |
|         | Column 2             | 200       | 88400 | 442       | 154.64322 |                      |              |
|         | Column 3             | 200       | 87800 | 439       | 342.32161 |                      |              |
|         | Column 4             | 200       | 88200 | 441       | 388.07035 |                      |              |
|         | Column 5             | 200       | 91000 | 455       | 642.39196 |                      |              |
| ANOVA   |                      |           |       |           |           |                      |              |
|         | Source of Variation  | SS        | df    | MS        | F         | $F_{0.05}(dfA, dfe)$ | Significance |
|         | Between Groups       | 45440     | 4     | 11360     | 34.219146 | 2.380875807          | *            |
|         | within Groups        | 330318    | 995   | 331.97789 |           |                      |              |
|         | Total                | 375758    | 999   |           |           |                      |              |
| ANOVA   |                      |           |       |           |           |                      |              |
|         | Source of Variation  | SS        | df    | MS        | F         | $F_{0.05}(dfA, dfe)$ | Significance |
|         | Between Groups       | 3494.921  | 4     | 873.73025 | 7.1122292 | 2.380875807          | *            |
|         | within Groups        | 122234.76 | 995   | 122.849   |           |                      |              |
|         | Total                | 125729.68 | 999   |           |           |                      |              |

  

| (b)     | Anova: Single Factor | diameter  |      |           |           |                      |              |
|---------|----------------------|-----------|------|-----------|-----------|----------------------|--------------|
| SUMMARY |                      |           |      |           |           |                      |              |
|         | Groups               | Count     | Sum  | Average   | Variance  |                      |              |
|         | Column 1             | 200       | 7600 | 38        | 106.84422 |                      |              |
|         | Column 2             | 200       | 7000 | 35        | 117.05528 |                      |              |
|         | Column 3             | 200       | 8200 | 41        | 128.13065 |                      |              |
|         | Column 4             | 200       | 7800 | 39        | 116.46231 |                      |              |
|         | Column 5             | 200       | 6993 | 34.965    | 145.75254 |                      |              |
| ANOVA   |                      |           |      |           |           |                      |              |
|         | Source of Variation  | SS        | df   | MS        | F         | $F_{0.05}(dfA, dfe)$ | Significance |
|         | Between Groups       | 3494.921  | 4    | 873.73025 | 7.1122292 | 2.380875807          | *            |
|         | within Groups        | 122234.76 | 995  | 122.849   |           |                      |              |
|         | Total                | 125729.68 | 999  |           |           |                      |              |

If  $F > F_{0.05}(dfA, dfe)$ , then factor A has a significant influence on the test result, which is indicated by "\*";

If  $F < F_{0.05}(dfA, dfe)$ , then the influence of factor A on the test results is not significant, so the "\*" sign is not used

**Tab. S5** ANVOA of the yield of CNC<sub>Fex</sub>

| Anova: Single Factor |           |       |            |           |                      |              |
|----------------------|-----------|-------|------------|-----------|----------------------|--------------|
| yield                |           |       |            |           |                      |              |
| SUMMARY              |           |       |            |           |                      |              |
| Groups               | Count     | Sum   | Average    | Variance  |                      |              |
| Column 1             | 3         | 282.2 | 94.066667  | 1.9033333 |                      |              |
| Column 2             | 3         | 277.6 | 92.5333333 | 0.2633333 |                      |              |
| Column 3             | 3         | 276.3 | 92.1       | 0.37      |                      |              |
| Column 4             | 3         | 282.2 | 94.066667  | 0.4433333 |                      |              |
| Column 5             | 3         | 279.9 | 93.3       | 1.27      |                      |              |
| ANOVA                |           |       |            |           |                      |              |
| Source of Variation  | SS        | df    | MS         | F         | $F_{0.05}(dfA, dfe)$ | Significance |
| Between Groups       | 9.4973333 | 4     | 2.3743333  | 2.7933333 | 3.478049691          |              |
| witin Groups         | 8.5       | 10    | 0.85       |           |                      |              |
| Total                | 17.997333 | 14    |            |           |                      |              |

If  $F > F_{0.05}(dfA, dfe)$ , then factor A has a significant influence on the test result, which is indicated by "\*\*".

If  $F < F_{0.05}(dfA, dfe)$ , then the influence of factor A on the test results is not significant, so the "\*" sign is not used.

**Tab. S6** ANVOA of  $X_c$  of CNC<sub>Fex</sub>

| Anova: Single Factor $X_c$ |           |       |           |           |                      |              |
|----------------------------|-----------|-------|-----------|-----------|----------------------|--------------|
| SUMMARY                    |           |       |           |           |                      |              |
| Groups                     | Count     | Sum   | Average   | Variance  |                      |              |
| Column 1                   | 3         | 228.9 | 76.3      | 1.71      |                      |              |
| Column 2                   | 3         | 227.2 | 75.733333 | 0.9433333 |                      |              |
| Column 3                   | 3         | 229.7 | 76.566667 | 0.2533333 |                      |              |
| Column 4                   | 3         | 224.4 | 74.8      | 0.07      |                      |              |
| Column 5                   | 3         | 230.7 | 76.9      | 0.43      |                      |              |
| ANOVA                      |           |       |           |           |                      |              |
| Source of Variation        | SS        | df    | MS        | F         | $F_{0.05}(dfA, dfe)$ | Significance |
| Between Groups             | 8.1426667 | 4     | 2.0356667 | 2.9877691 | 3.478049691          |              |
| witin Groups               | 6.8133333 | 10    | 0.6813333 |           |                      |              |
| Total                      | 14.956    | 14    |           |           |                      |              |

If  $F > F_{0.05}(dfA, dfe)$ , then factor A has a significant influence on the test result, which is indicated by "\*\*";

If  $F < F_{0.05}(dfA, dfe)$ , then the influence of factor A on the test results is not significant, so the "\*" sign is not used.

**Tab. S7** ANVOA of  $T_{max}$  of CNC<sub>Fex</sub>

| Anova: Single Factor $T_{max}$ |           |        |           |           |                      |              |
|--------------------------------|-----------|--------|-----------|-----------|----------------------|--------------|
| SUMMARY                        |           |        |           |           |                      |              |
| Groups                         | Count     | Sum    | Average   | Variance  |                      |              |
| Column 1                       | 3         | 1062.9 | 354.3     | 1.48      |                      |              |
| Column 2                       | 3         | 1053.3 | 351.1     | 7.87      |                      |              |
| Column 3                       | 3         | 1062.9 | 354.3     | 8.68      |                      |              |
| Column 4                       | 3         | 1062.2 | 354.06667 | 4.6633333 |                      |              |
| Column 5                       | 3         | 1070   | 356.66667 | 3.4233333 |                      |              |
| ANOVA                          |           |        |           |           |                      |              |
| Source of Variation            | SS        | df     | MS        | F         | $F_{0.05}(dfA, dfe)$ | Significance |
| Between Groups                 | 47.004    | 4      | 11.751    | 2.2497128 | 3.478049691          |              |
| witin Groups                   | 52.233333 | 10     | 5.2233333 |           |                      |              |
| Total                          | 99.237333 | 14     |           |           |                      |              |

If  $F > F_{0.05}(dfA, dfe)$ , then factor A has a significant influence on the test result, which is indicated by "\*\*";

If  $F < F_{0.05}(df_A, df_e)$ , then the influence of factor A on the test results is not significant, so the "\*" sign is not used.

## References

- 1 M. Cheng, Z. Qin, Y. Chen, S. Hu, Z. Ren and M. Zhu, *ACS Sustain. Chem. Eng.*, 2017, **5**, 4656–4664.
- 2 X. Yang, H. Xie, H. Du, X. Zhang, Z. Zou, Y. Zou, W. Liu, H. Lan, X. Zhang and C. Si, *ACS Sustain. Chem. Eng.*, 2019, **7**, 7200–7208.
- 3 W. Liu, H. Du, H. Liu, H. Xie, T. Xu, X. Zhao, Y. Liu, X. Zhang and C. Si, *ACS Sustain. Chem. Eng.*, 2020, **8**, 16691–16700.
- 4 Y. Chen, H. Y. Yu and Y. Li, *ACS Sustain. Chem. Eng.*, 2020, **8**, 18446–18454.
- 5 L. Chen, J. Y. Zhu, C. Baez, P. Kitin and T. Elder, *Green Chem.*, 2016, **18**, 3835–3843.
- 6 R. S. Mehedi, R. Timo, P. Jessie and P. E. Kontturi, *Cellulose*, 2017, **24**, 1657–1667.
- 7 H. Yu, S. Y. H. Abdalkarim, H. Zhang, C. Wang and K. C. Tam, *ACS Sustain. Chem. Eng.*, 2019, **7**, 4912–4923.
- 8 H. Yu, Z. Qin, B. Liang, N. Liu, Z. Zhou and L. Chen, *J. Mater. Chem. A*, 2013, **1**, 3938–3944.
- 9 X. M. Fan, H. Y. Yu, D. C. Wang, Z. H. Mao, J. Yao and K. C. Tam, *ACS Sustain. Chem. Eng.*, 2019, **7**, 18067–18075.
